# Supplementary material for: Probing the potential of halogen-free superhalogen anions as effective electrolytes of Li-ion batteries: a theoretical prospect from combined ab initio and DFT studies
Source: Royal Society of Chemistry journal article supplement (doi:10.1039/c6cp05871j), 2016-01-01
Supplement: c6cp05871j1.pdf [file c6cp05871j1.pdf]

## **Electronic Supplementary Information**

### **Probing the potential of halogen-free superhalogen anions forming effective electrolyte of Li-ion battery. A theoretical prospect from combined *ab initio* and DFT study**

**Yin-Yin Sun, Jin-Feng Li, Fu-Qiang Zhou, Jian-Li Li, Bing Yin\***

MOE Key Laboratory of Synthetic and Natural Functional Molecule Chemistry,  
Shaanxi Key Laboratory of Physico-Inorganic Chemistry, College of Chemistry and  
Materials Science, Northwest University, Xi'an 710069, China.

\*E-mail: rayinyin@nwu.edu.cn

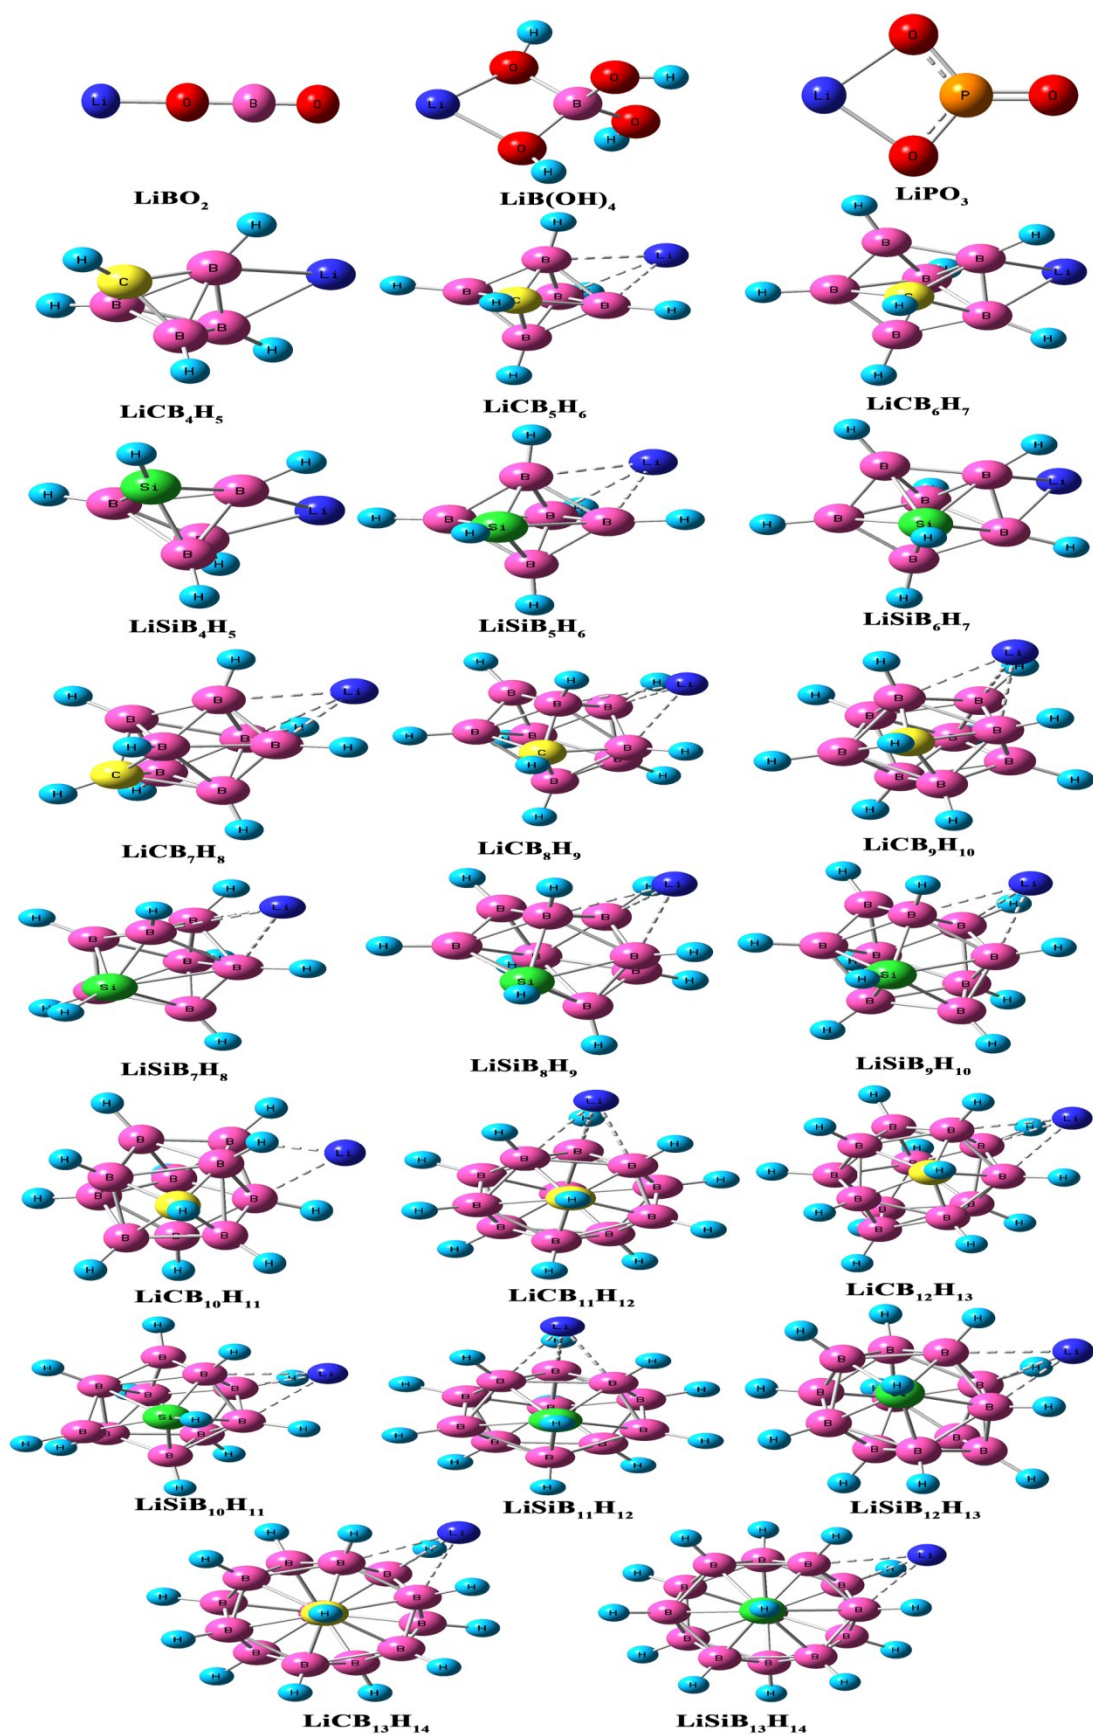

**Fig. S1** Optimized geometries of different Li-salts containing new potential electrolytes in Li-ion batteries under study at  $\omega\text{B97XD/6-311+G}^*$  level.

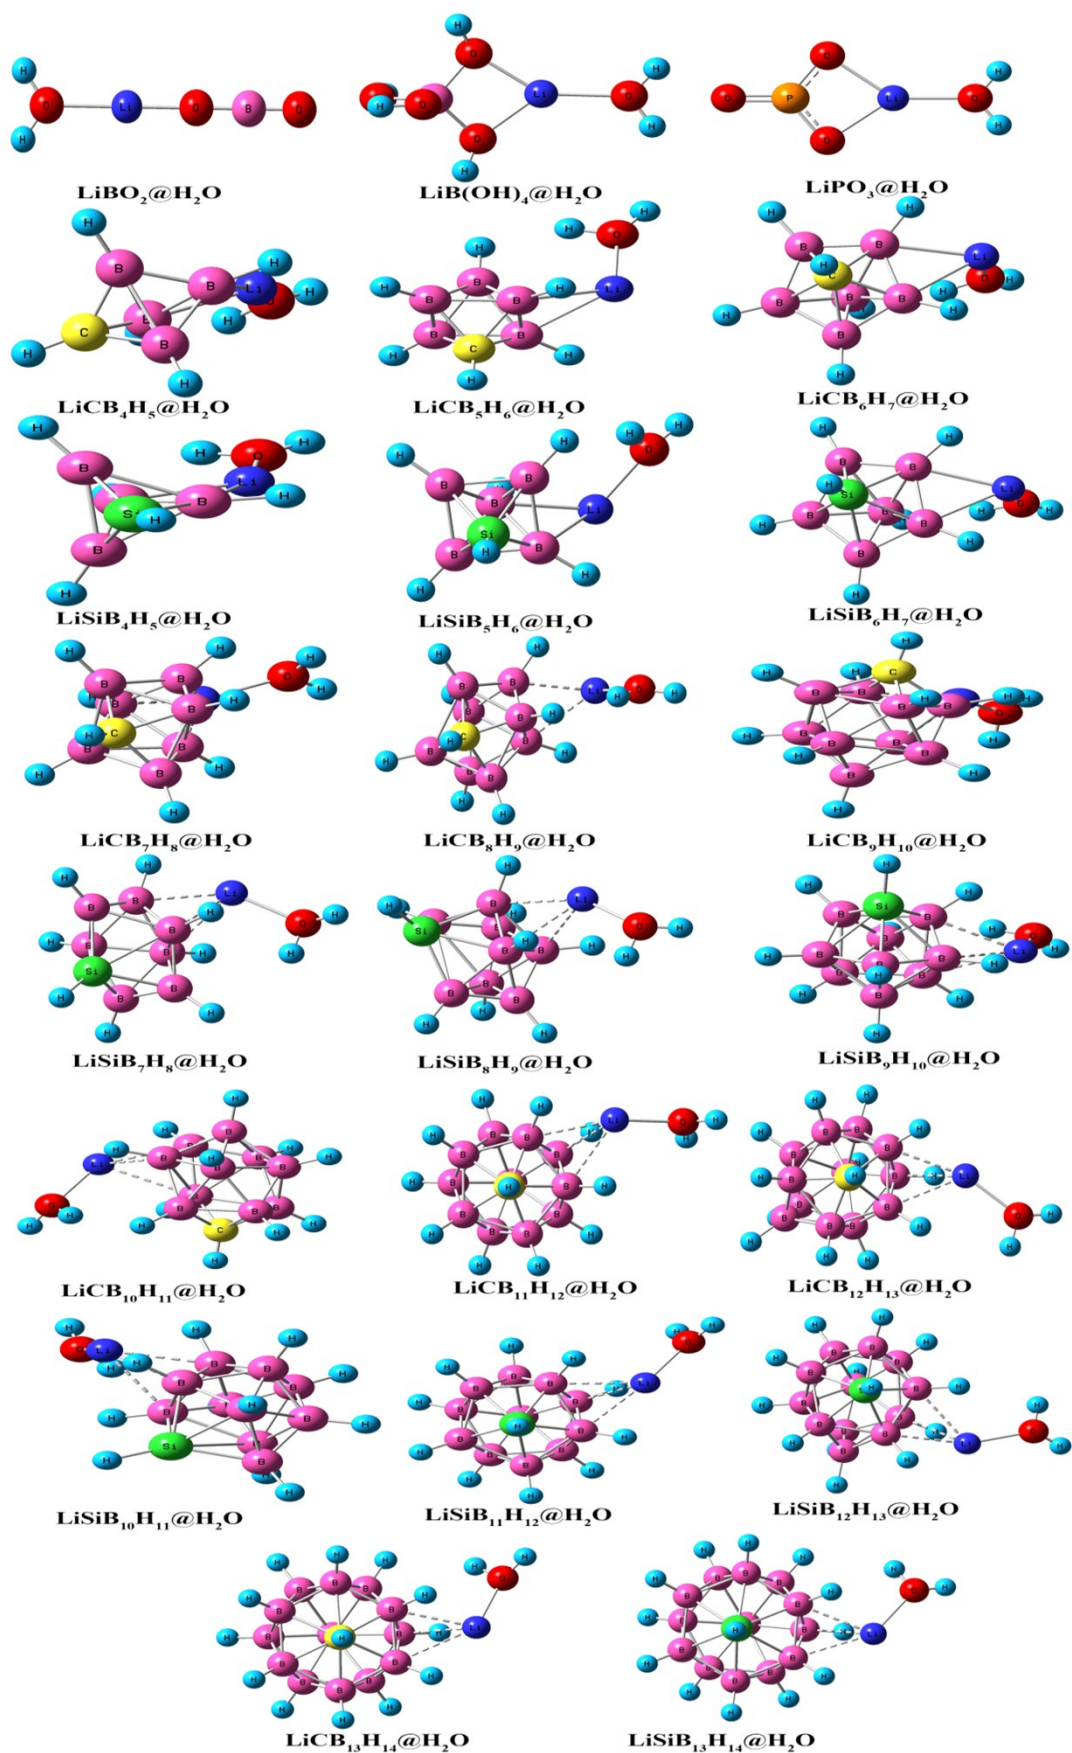

**Fig. S2** Optimized geometries of Li-salts interacting with  $H_2O$  under study at  $\omega B97XD/6-311+G^*$  level.

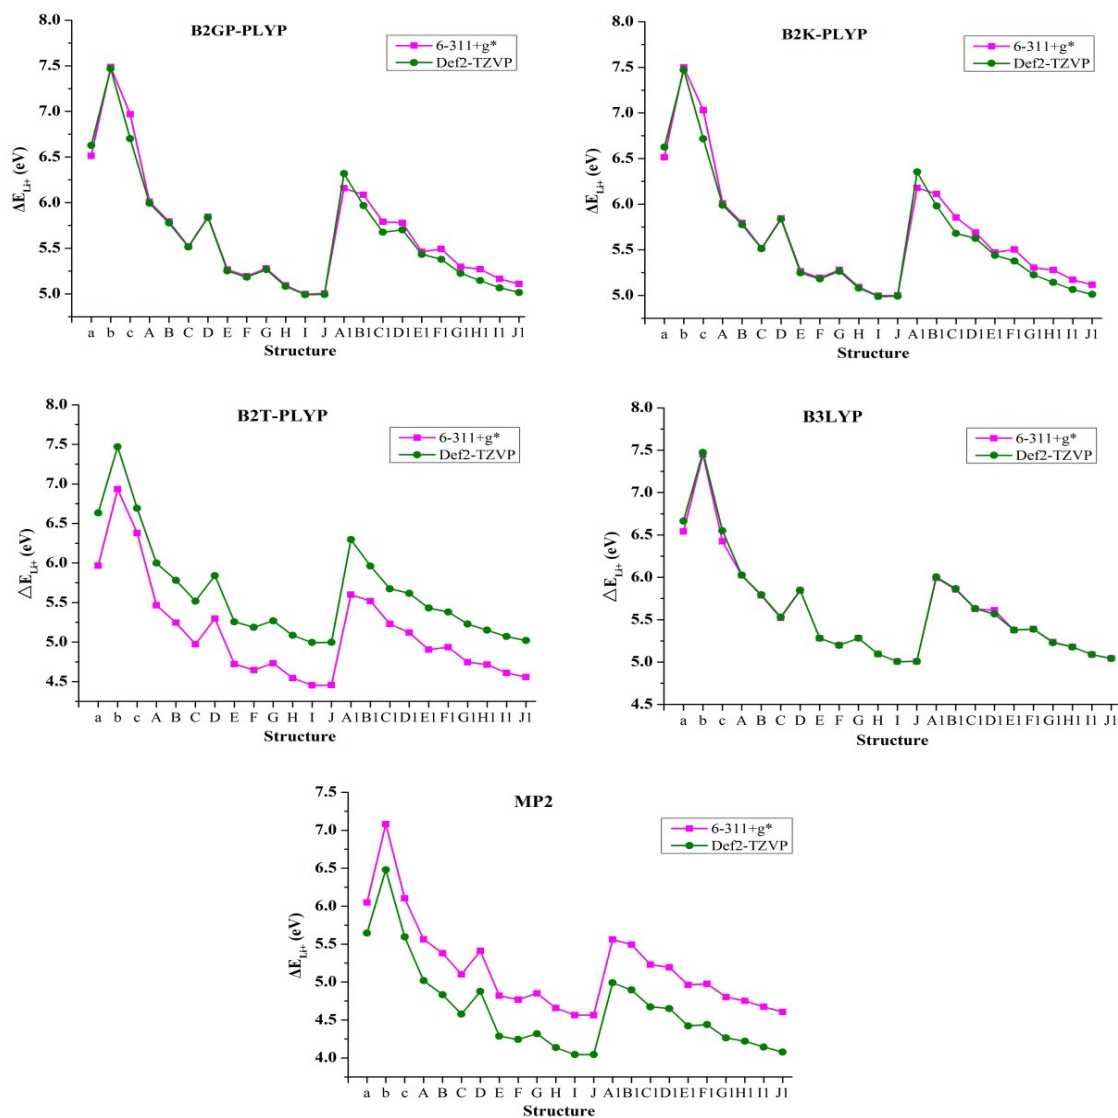

**Fig. S3** The variations of  $\text{Li}^+$  Binding Energy ( $\Delta E_{\text{Li}^+}$ ) of twenty-three potential new electrolytes (**a-JI**) at various functionals levels with different basis sets.

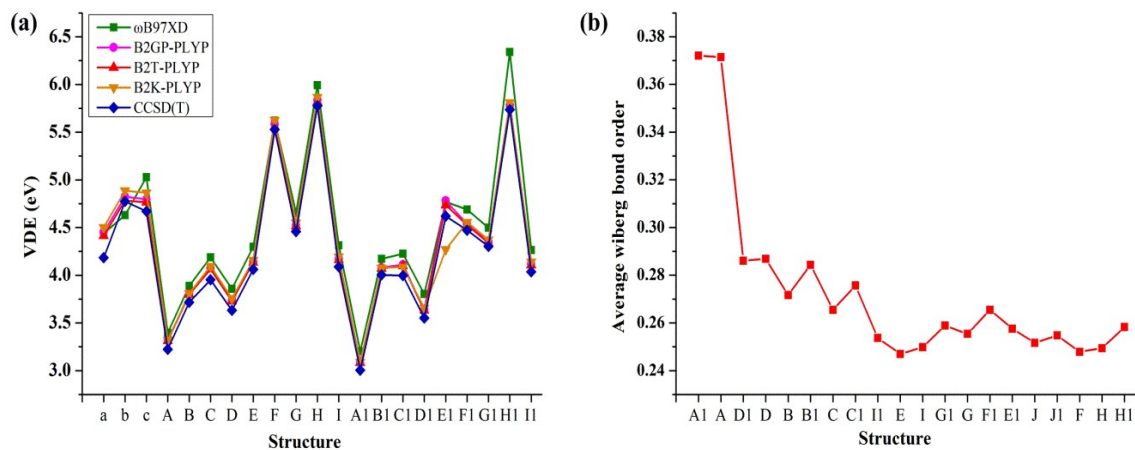

**Fig. S4** (a) The variations of VDE of anion (**a-I1**) at various functionals and CCSD(T) levels with 6-311+G\* basis set; (b) The Li-B average wiberg bond order of the corresponding Li-salt with increasing VDE of anion (**A-J1**) at the  $\omega$ B97XD/6-311+G\* level.

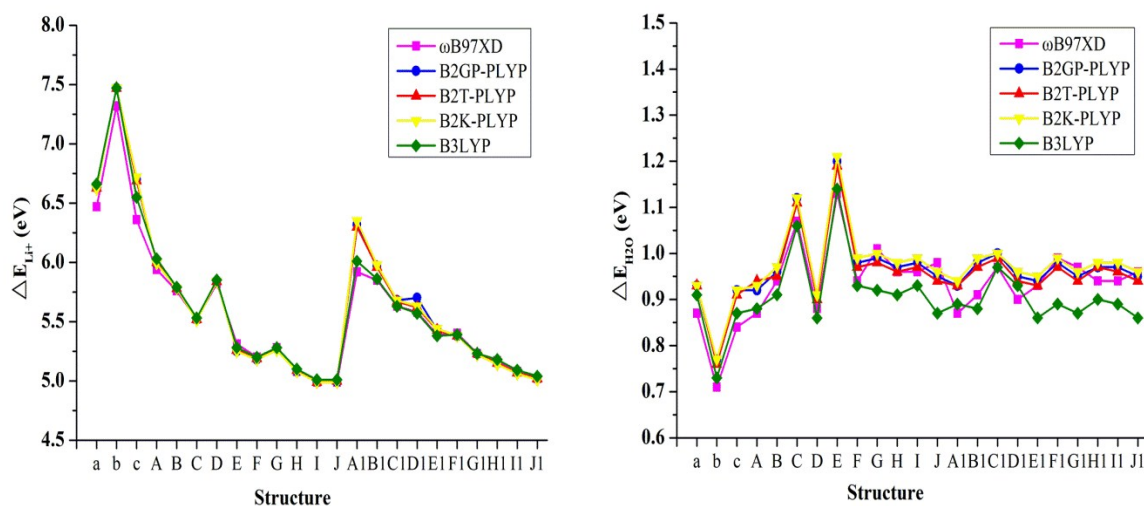

**Fig. S(5)** The variations of Li<sup>+</sup>(a) and H<sub>2</sub>O(b) binding energy ( $\Delta E_{Li^+}$ ,  $\Delta E_{H_2O}$ ) of the structure (**a-J1**) at various functional level with Def2-TZVP basis set.

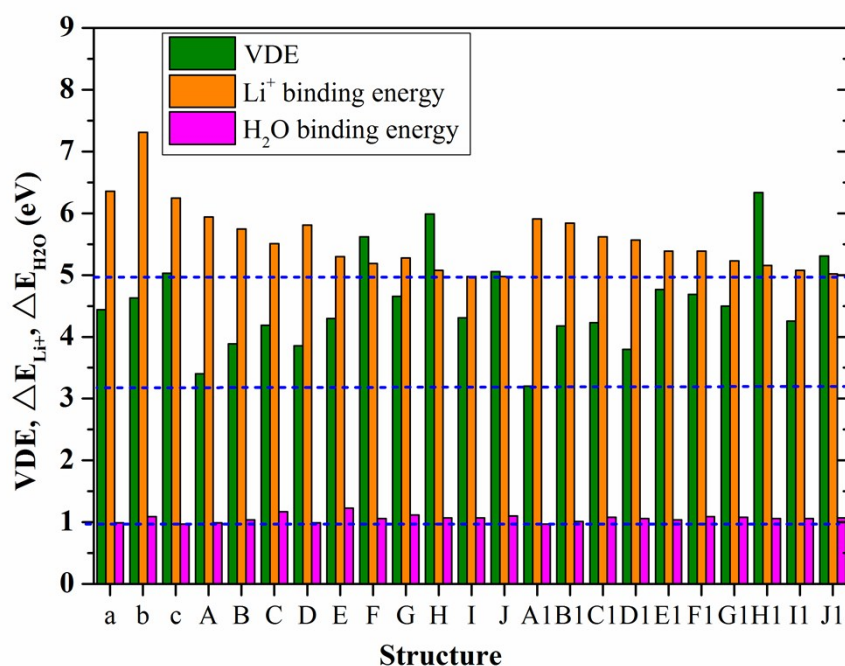

**Fig. S(6)** Comparison between VDEs and binding energies of Li<sup>+</sup> and H<sub>2</sub>O in proposed new halogen-free electrolytes at  $\omega$ B97XD/6-311+G\* level.

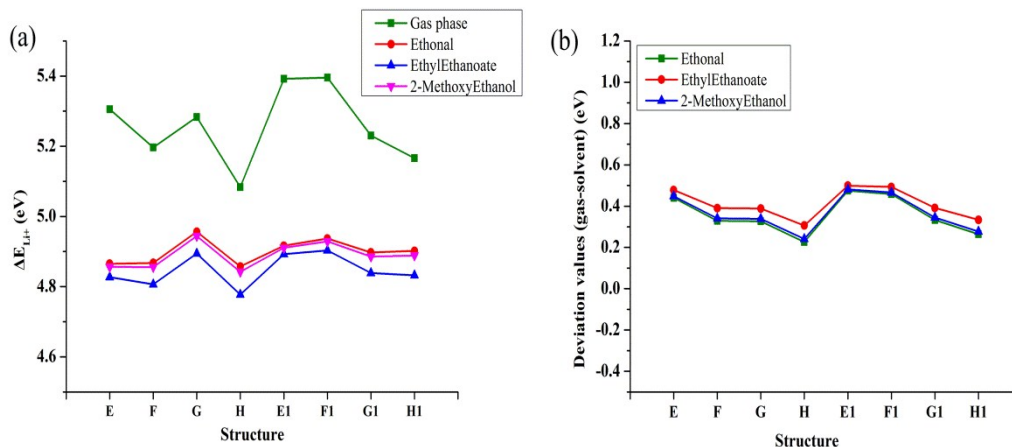

Fig. S6 The variations of  $Li^+$  binding energy ( $\Delta E_{Li^+}$ ) (a) values and the deviation values of the structure E,F,G,H, E1,F1,G1, H1 between the different solvent and gas-phase

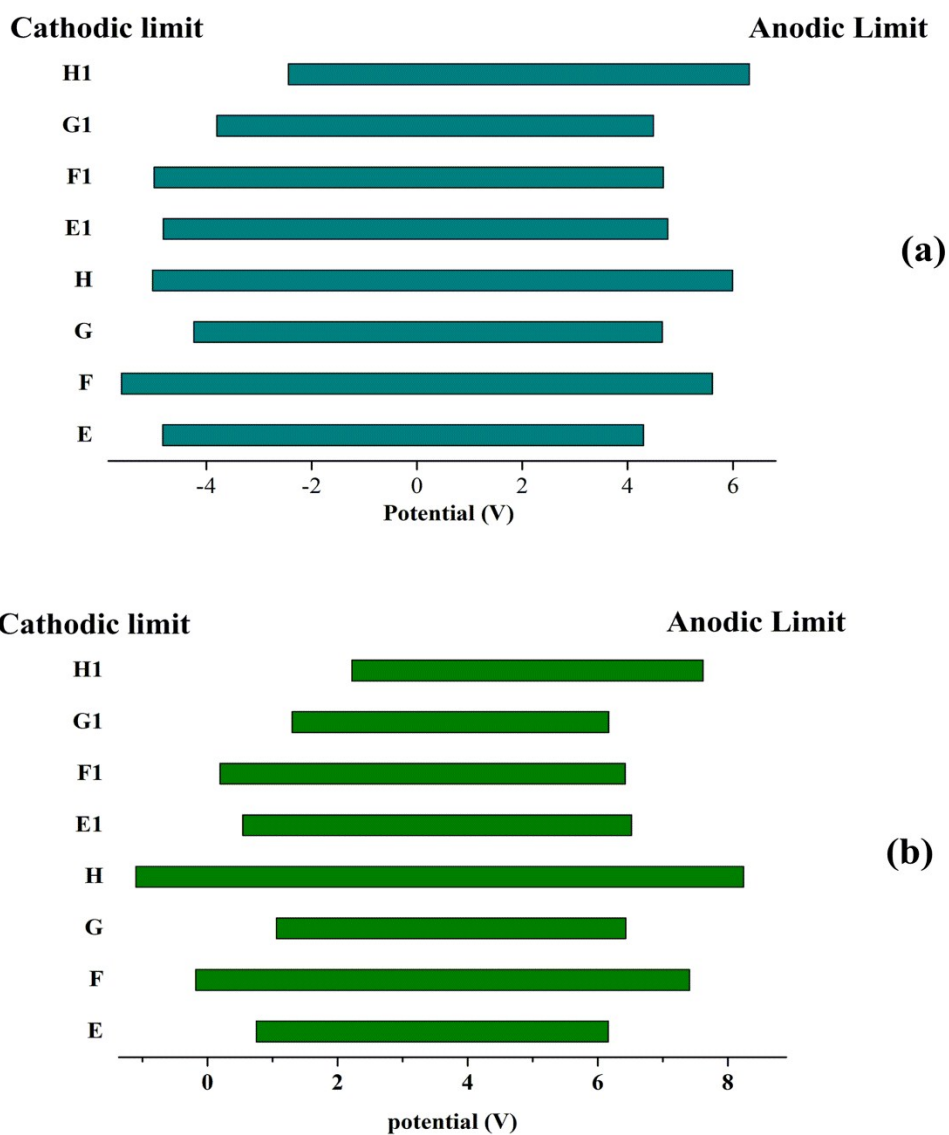

Fig. S7 The calculated  $V_{cl}$ ,  $V_{al}$  and EW of selected electrolytes from both gas phase(a) and ethanol solvent calculations.

**Table S1** Calculated  $\Delta E_{Li^+}$  values of the potential new electrolytes for Li-ion battery under study at various theoretical levels (in eV)

|                      | $\omega$ B97XD    | B2GP-PLYP | B2T-PLYP | B2K-PLYP | B3LYP | MP2  | CCSD(T) |
|----------------------|-------------------|-----------|----------|----------|-------|------|---------|
| <b>a<sup>a</sup></b> | 6.36 <sup>b</sup> | 6.51      | 5.97     | 6.51     | 6.54  | 6.05 | 6.02    |
| <b>b</b>             | 7.31              | 7.49      | 6.93     | 7.50     | 7.45  | 7.08 | 7.02    |
| <b>c</b>             | 6.25              | 6.97      | 6.38     | 7.03     | 6.42  | 6.10 | 6.07    |
| <b>A</b>             | 5.94              | 6.01      | 5.47     | 6.01     | 6.02  | 5.56 | 5.53    |
| <b>B</b>             | 5.75              | 5.79      | 5.25     | 5.79     | 5.79  | 5.38 | 5.33    |
| <b>C</b>             | 5.51              | 5.52      | 4.97     | 5.52     | 5.52  | 5.10 | 5.04    |
| <b>D</b>             | 5.81              | 5.84      | 5.30     | 5.84     | 5.84  | 5.41 | 5.36    |
| <b>E</b>             | 5.30              | 5.27      | 4.72     | 5.26     | 5.28  | 4.82 | 4.79    |
| <b>F</b>             | 5.19              | 5.19      | 4.65     | 5.19     | 5.20  | 4.77 | 4.71    |
| <b>G</b>             | 5.28              | 5.28      | 4.73     | 5.28     | 5.28  | 4.85 | 4.80    |
| <b>H</b>             | 5.08              | 5.09      | 4.55     | 5.09     | 5.10  | 4.65 | 4.60    |
| <b>I</b>             | 4.98              | 5.00      | 4.45     | 5.00     | 5.01  | 4.56 | 4.50    |
| <b>J</b>             | 4.98              | 5.00      | 4.46     | 5.00     | 5.01  | 4.56 | 4.50    |
| <b>A1</b>            | 5.91              | 6.16      | 5.60     | 6.12     | 5.99  | 5.56 | 5.51    |
| <b>B1</b>            | 5.84              | 6.09      | 5.52     | 6.11     | 5.86  | 5.49 | 5.44    |
| <b>C1</b>            | 5.62              | 5.79      | 5.23     | 5.85     | 5.63  | 5.23 | 5.18    |
| <b>D1</b>            | 5.57              | 5.78      | 5.22     | 5.80     | 5.61  | 5.19 | 5.14    |
| <b>E1</b>            | 5.39              | 5.46      | 4.91     | 5.47     | 5.38  | 4.96 | 4.91    |
| <b>F1</b>            | 5.39              | 5.49      | 4.94     | 5.50     | 5.39  | 4.98 | 4.92    |
| <b>G1</b>            | 5.23              | 5.30      | 4.74     | 5.30     | 5.24  | 4.80 | 4.76    |
| <b>H1</b>            | 5.16              | 5.27      | 4.72     | 5.28     | 5.18  | 4.75 | 4.70    |
| <b>I1</b>            | 5.08              | 5.16      | 4.61     | 5.17     | 5.09  | 4.67 | 4.61    |
| <b>J1</b>            | 5.02              | 5.11      | 4.56     | 5.12     | 5.04  | 4.61 | 4.55    |

<sup>a</sup> Entry shows deviation values.

<sup>b</sup> Results obtained with the 6-311+g\* basis set.

**Table S2** Calculated  $\Delta E_{H_2O}$  values of the potential new electrolytes for Li-ion battery under study at various theoretical levels (in eV)

|                      | $\omega$ B97XD    | B2GP-PLYP | B2T-PLYP | B2K-PLYP | B3LYP | MP2  | CCSD(T) |
|----------------------|-------------------|-----------|----------|----------|-------|------|---------|
| <b>a<sup>a</sup></b> | 0.99 <sup>b</sup> | 1.08      | 1.07     | 1.09     | 1.01  | 1.11 | 1.10    |
| <b>b</b>             | 0.82              | 0.92      | 0.91     | 0.93     | 0.84  | 0.96 | 0.96    |
| <b>c</b>             | 0.97              | 1.11      | 1.10     | 1.13     | 0.99  | 1.10 | 1.10    |
| <b>A</b>             | 0.99              | 1.06      | 1.05     | 1.07     | 0.98  | 1.10 | 1.10    |
| <b>B</b>             | 1.04              | 1.07      | 1.07     | 1.09     | 1.00  | 1.10 | 1.10    |
| <b>C</b>             | 1.17              | 1.23      | 1.22     | 1.24     | 1.19  | 1.25 | 1.25    |
| <b>D</b>             | 0.99              | 1.04      | 1.03     | 1.06     | 0.95  | 1.09 | 1.09    |
| <b>E</b>             | 1.23              | 1.32      | 1.31     | 1.34     | 1.22  | 1.36 | 1.34    |
| <b>F</b>             | 1.06              | 1.13      | 1.12     | 1.14     | 1.03  | 1.17 | 1.17    |
| <b>G</b>             | 1.12              | 1.12      | 1.11     | 1.14     | 1.00  | 1.18 | 1.17    |
| <b>H</b>             | 1.07              | 1.11      | 1.10     | 1.13     | 1.01  | 1.17 | 1.16    |

|           |      |      |      |      |      |      |      |
|-----------|------|------|------|------|------|------|------|
| <b>I</b>  | 1.07 | 1.13 | 1.12 | 1.14 | 1.03 | 1.18 | 1.18 |
| <b>J</b>  | 1.10 | 1.08 | 1.06 | 1.10 | 0.96 | 1.14 | 1.14 |
| <b>A1</b> | 0.98 | 1.05 | 1.04 | 1.07 | 0.97 | 1.09 | 1.09 |
| <b>B1</b> | 1.01 | 1.04 | 1.03 | 1.05 | 0.97 | 1.08 | 1.07 |
| <b>C1</b> | 1.08 | 1.11 | 1.11 | 1.12 | 1.06 | 1.16 | 1.16 |
| <b>D1</b> | 1.02 | 1.09 | 1.07 | 1.11 | 0.97 | 1.12 | 1.11 |
| <b>E1</b> | 1.04 | 1.07 | 1.06 | 1.09 | 0.95 | 1.11 | 1.11 |
| <b>F1</b> | 1.09 | 1.09 | 1.08 | 1.11 | 0.97 | 1.15 | 1.14 |
| <b>G1</b> | 1.08 | 1.07 | 1.05 | 1.09 | 0.96 | 1.14 | 1.13 |
| <b>H1</b> | 1.06 | 1.11 | 1.10 | 1.13 | 1.00 | 1.15 | 1.15 |
| <b>I1</b> | 1.06 | 1.10 | 1.09 | 1.12 | 0.99 | 1.15 | 1.15 |
| <b>J1</b> | 1.07 | 1.07 | 1.06 | 1.09 | 0.96 | 1.13 | 1.13 |

<sup>a</sup> Entry shows deviation values.

<sup>b</sup> Results obtained with the 6-311+G\* basis set.

**Table S3** The deviation of the  $\Delta E_{Li^+}$  between CCSD(T) and DFT methods for the superhalogen structures(**a-J1**) (in eV).

|                      | <b><math>\omega</math>B97XD</b> | <b>B2GP-PLYP</b> | <b>B2T-PLYP</b> | <b>B2K-PLYP</b> | <b>B3LYP</b> | <b>MP2</b> |
|----------------------|---------------------------------|------------------|-----------------|-----------------|--------------|------------|
| <b>a<sup>a</sup></b> | 0.92 <sup>b</sup>               | 1.08             | 1.08            | 1.08            | 1.11         | 0.10       |
| <b>b</b>             | 0.95                            | 1.10             | 1.10            | 1.10            | 1.10         | 0.11       |
| <b>c</b>             | 0.86                            | 1.21             | 1.20            | 1.22            | 1.06         | 0.10       |
| <b>A</b>             | 1.02                            | 1.07             | 1.07            | 1.06            | 1.10         | 0.09       |
| <b>B</b>             | 1.04                            | 1.05             | 1.06            | 1.05            | 1.07         | 0.11       |
| <b>C</b>             | 1.06                            | 1.05             | 1.06            | 1.05            | 1.07         | 0.12       |
| <b>D</b>             | 1.06                            | 1.07             | 1.07            | 1.07            | 1.08         | 0.11       |
| <b>E</b>             | 1.11                            | 1.05             | 1.06            | 1.05            | 1.08         | 0.09       |
| <b>F</b>             | 1.07                            | 1.06             | 1.06            | 1.06            | 1.07         | 0.12       |
| <b>G</b>             | 1.08                            | 1.06             | 1.06            | 1.06            | 1.07         | 0.11       |
| <b>H</b>             | 1.07                            | 1.06             | 1.07            | 1.06            | 1.08         | 0.12       |
| <b>I</b>             | 1.07                            | 1.07             | 1.07            | 1.07            | 1.09         | 0.12       |
| <b>J</b>             | 1.06                            | 1.07             | 1.07            | 1.07            | 1.09         | 0.12       |
| <b>A1</b>            | 1.04                            | 1.44             | 1.42            | 1.48            | 1.13         | 0.11       |
| <b>B1</b>            | 1.06                            | 1.18             | 1.18            | 1.20            | 1.08         | 0.11       |
| <b>C1</b>            | 1.07                            | 1.12             | 1.11            | 1.12            | 1.07         | 0.11       |
| <b>D1</b>            | 1.05                            | 1.17             | 1.17            | 1.18            | 1.04         | 0.12       |
| <b>E1</b>            | 1.09                            | 1.13             | 1.13            | 1.14            | 1.08         | 0.12       |
| <b>F1</b>            | 1.08                            | 1.06             | 1.06            | 1.06            | 1.07         | 0.12       |
| <b>G1</b>            | 1.07                            | 1.07             | 1.07            | 1.07            | 1.07         | 0.11       |
| <b>H1</b>            | 1.06                            | 1.04             | 1.05            | 1.04            | 1.08         | 0.12       |
| <b>I1</b>            | 1.06                            | 1.04             | 1.05            | 1.04            | 1.07         | 0.12       |
| <b>J1</b>            | 1.06                            | 1.06             | 1.06            | 1.05            | 1.08         | 0.12       |

<sup>a</sup> Entry shows deviation values.

<sup>b</sup> Results obtained with the Def2-TZVP basis set.



**Table S4** The deviation of the  $\Delta E_{\text{H}_2\text{O}}$  between CCSD(T) and DFT methods for the superhalogen structures(**a-J1**) (in eV).

|                      | <b><math>\omega</math>B97XD</b> | <b>B2GP-PLYP</b> | <b>B2T-PLYP</b> | <b>B2K-PLYP</b> | <b>B3LYP</b> |
|----------------------|---------------------------------|------------------|-----------------|-----------------|--------------|
| <b>a<sup>a</sup></b> | -0.03 <sup>b</sup>              | 0.04             | 0.04            | 0.04            | 0.02         |
| <b>b</b>             | -0.04                           | 0.02             | 0.02            | 0.03            | -0.01        |
| <b>c</b>             | -0.02                           | 0.05             | 0.05            | 0.06            | 0.01         |
| <b>A</b>             | -0.02                           | 0.03             | 0.03            | 0.04            | -0.01        |
| <b>B</b>             | 0.01                            | 0.02             | 0.02            | 0.03            | -0.02        |
| <b>C</b>             | -0.02                           | 0.03             | 0.02            | 0.04            | -0.03        |
| <b>D</b>             | -0.01                           | 0.02             | 0.01            | 0.02            | -0.03        |
| <b>E</b>             | -0.05                           | 0.03             | 0.02            | 0.04            | -0.04        |
| <b>F</b>             | -0.01                           | 0.03             | 0.02            | 0.03            | -0.02        |
| <b>G</b>             | 0.02                            | 0                | -0.01           | 0.01            | -0.08        |
| <b>H</b>             | 0                               | 0.01             | 0.01            | 0.02            | -0.04        |
| <b>I</b>             | -0.01                           | 0.02             | 0.01            | 0.03            | -0.04        |
| <b>J</b>             | 0.03                            | 0                | -0.02           | 0.01            | -0.09        |
| <b>A1</b>            | -0.02                           | 0.05             | 0.04            | 0.05            | 0            |
| <b>B1</b>            | 0                               | 0.07             | 0.06            | 0.08            | -0.03        |
| <b>C1</b>            | -0.02                           | 0                | 0               | 0               | -0.03        |
| <b>D1</b>            | -0.01                           | 0.04             | 0.03            | 0.05            | 0.02         |
| <b>E1</b>            | 0.01                            | 0.02             | 0.01            | 0.03            | -0.06        |
| <b>F1</b>            | 0.02                            | 0.01             | 0               | 0.02            | -0.08        |
| <b>G1</b>            | 0.02                            | 0                | -0.01           | 0.01            | -0.08        |
| <b>H1</b>            | 0                               | 0.03             | 0.03            | 0.04            | -0.04        |
| <b>I1</b>            | 0                               | 0.03             | 0.02            | 0.04            | -0.05        |
| <b>J1</b>            | 0.02                            | 0.01             | 0               | 0.02            | -0.08        |

<sup>a</sup> Entry shows deviation values.

<sup>b</sup>Results obtained with the Def2-TZVP basis set.

**Table S5** Calculated VDEs,  $\Delta E_{\text{Li}^+}$ ,  $\Delta E_{\text{H}_2\text{O}}$  and molar volume at the  $\omega$ B97XD /6-311+G(d) level for potential new electrolytes in Li-ion battery.

|           | VDE [eV] | $\Delta E_{\text{Li}^+}$ [eV] | $\Delta E_{\text{H}_2\text{O}}$ [eV] |
|-----------|----------|-------------------------------|--------------------------------------|
| <b>a</b>  | 4.44     | 6.36                          | 0.99                                 |
| <b>b</b>  | 4.63     | 7.31                          | 1.09                                 |
| <b>c</b>  | 5.03     | 6.25                          | 0.97                                 |
| <b>A</b>  | 3.40     | 5.94                          | 0.99                                 |
| <b>B</b>  | 3.89     | 5.75                          | 1.04                                 |
| <b>C</b>  | 4.19     | 5.51                          | 1.17                                 |
| <b>D</b>  | 3.86     | 5.81                          | 0.99                                 |
| <b>E</b>  | 4.30     | 5.30                          | 1.23                                 |
| <b>F</b>  | 5.62     | 5.19                          | 1.06                                 |
| <b>G</b>  | 4.66     | 5.28                          | 1.12                                 |
| <b>H</b>  | 5.99     | 5.08                          | 1.07                                 |
| <b>I</b>  | 4.31     | 4.98                          | 1.07                                 |
| <b>J</b>  | 5.06     | 4.98                          | 1.10                                 |
| <b>A1</b> | 3.20     | 5.91                          | 0.97                                 |
| <b>B1</b> | 4.18     | 5.84                          | 1.01                                 |
| <b>C1</b> | 4.23     | 5.62                          | 1.08                                 |
| <b>D1</b> | 3.80     | 5.57                          | 1.06                                 |
| <b>E1</b> | 4.77     | 5.39                          | 1.04                                 |
| <b>F1</b> | 4.69     | 5.39                          | 1.09                                 |
| <b>G1</b> | 4.50     | 5.23                          | 1.08                                 |
| <b>H1</b> | 6.34     | 5.16                          | 1.06                                 |
| <b>I1</b> | 4.26     | 5.08                          | 1.06                                 |
| <b>J1</b> | 5.31     | 5.02                          | 1.07                                 |

**Table S6** The deviation of the VDE between CCSD(T) and DFT methods for the superhalogen structures(**a- c** , **A-I**, **A1-I1**) (in eV).

|                      | $\omega$ B97XD    | B2GP-PLYP | B2T-PLYP | B2K-PLYP |
|----------------------|-------------------|-----------|----------|----------|
| <b>a<sup>a</sup></b> | 0.26 <sup>b</sup> | 0.27      | 0.23     | 0.32     |
| <b>b</b>             | -0.14             | 0.05      | 0.01     | 0.11     |
| <b>c</b>             | 0.36              | 0.13      | 0.09     | 0.19     |
| <b>A</b>             | 0.17              | 0.10      | 0.09     | 0.10     |
| <b>B</b>             | 0.17              | 0.09      | 0.08     | 0.10     |
| <b>C</b>             | 0.24              | 0.12      | 0.11     | 0.14     |
| <b>D</b>             | 0.23              | 0.10      | 0.10     | 0.12     |
| <b>E</b>             | 0.24              | 0.08      | 0.08     | 0.10     |
| <b>F</b>             | 0.09              | 0.06      | 0.03     | 0.10     |
| <b>G</b>             | 0.20              | 0.07      | 0.06     | 0.10     |
| <b>H</b>             | 0.22              | 0.06      | 0.04     | 0.09     |
| <b>I</b>             | 0.23              | 0.09      | 0.08     | 0.11     |
| <b>A1</b>            | 0.20              | 0.08      | 0.08     | 0.08     |
| <b>B1</b>            | 0.17              | 0.07      | 0.07     | 0.07     |
| <b>C1</b>            | 0.23              | 0.12      | 0.10     | 0.09     |
| <b>D1</b>            | 0.25              | 0.09      | 0.08     | 0.11     |
| <b>E1</b>            | 0.15              | 0.16      | 0.12     | -0.35    |
| <b>F1</b>            | 0.22              | 0.07      | 0.05     | 0.08     |
| <b>G1</b>            | 0.20              | 0.05      | 0.04     | 0.07     |
| <b>H1</b>            | 0.60              | 0.05      | 0.03     | 0.07     |
| <b>I1</b>            | 0.23              | 0.08      | 0.07     | 0.10     |

<sup>a</sup> Entry shows deviation values.

<sup>b</sup> Results obtained with the 6-311+g\* basis set.

**Table S7** Calculated the  $\Delta E_{Li^+}$  of the some potential new electrolytes for Li-ion battery under study at the  $\omega$ B97XD /Def2-TZVP level (in eV)

|           | Gas-phase | Ethonal                 | EthylEthanoate          | 2-MethoxyEthanol        |
|-----------|-----------|-------------------------|-------------------------|-------------------------|
| <b>E</b>  | 5.31      | 4.87(0.44) <sup>a</sup> | 4.83(0.48) <sup>a</sup> | 4.86(0.45) <sup>a</sup> |
| <b>F</b>  | 5.20      | 4.87(0.33)              | 4.81(0.39)              | 4.86(0.34)              |
| <b>G</b>  | 5.28      | 4.96(0.32)              | 4.89(0.39)              | 4.94(0.34)              |
| <b>H</b>  | 5.08      | 4.86(0.22)              | 4.78(0.30)              | 4.84(0.24)              |
| <b>E1</b> | 5.39      | 4.92(0.47)              | 4.89(0.50)              | 4.91(0.48)              |
| <b>F1</b> | 5.40      | 4.94(0.46)              | 4.90(0.50)              | 4.93(0.47)              |
| <b>G1</b> | 5.23      | 4.90(0.33)              | 4.84(0.39)              | 4.89(0.34)              |
| <b>H1</b> | 5.17      | 4.90(0.27)              | 4.83(0.34)              | 4.89(0.28)              |

<sup>a</sup> the deviation of the  $\Delta E_{Li^+}$  between the gas-phase and various solvents

Lowest normal mode frequencies and optimized coordinates at  $\omega$ B97XD /6-311+G\* level of the anions **a-c, A-J, A1-J1**

**a**

Lowest normal mode frequency: 608.4 cm<sup>-1</sup>

Optimized coordinates at  $\omega$ B97XD /6-311+G\* level:

|   |            |            |             |
|---|------------|------------|-------------|
| B | 0.00000000 | 0.00000000 | 0.00000000  |
| O | 0.00000000 | 0.00000000 | 1.26038200  |
| O | 0.00000000 | 0.00000000 | -1.26038200 |

**b**

Lowest normal mode frequency: 189.94 cm<sup>-1</sup>

Optimized coordinates at  $\omega$ B97XD /6-311+G\* level:

|   |             |             |             |
|---|-------------|-------------|-------------|
| B | 0.00000000  | 0.00000000  | 0.00000000  |
| O | 1.05071100  | 0.67588200  | -0.79702200 |
| H | 1.67621500  | -0.00558000 | -1.04571800 |
| O | -1.05071000 | -0.67588300 | -0.79702200 |
| H | -1.67621400 | 0.00557900  | -1.04571900 |
| O | 0.67588300  | -1.05071000 | 0.79702300  |
| H | -0.00558000 | -1.67621400 | 1.04572000  |
| O | -0.67588300 | 1.05071100  | 0.79702100  |
| H | 0.00557900  | 1.67621500  | 1.04571800  |

**c**

Lowest normal mode frequency: 467.47 cm<sup>-1</sup>

Optimized coordinates at  $\omega$ B97XD /6-311+G\* level:

|   |             |             |             |
|---|-------------|-------------|-------------|
| O | -1.45764900 | -0.32365400 | 0.00007300  |
| O | 1.00913100  | -1.10044900 | -0.00006400 |
| O | 0.44851900  | 1.42407000  | -0.00000800 |
| P | 0.00000000  | 0.00001800  | 0.00000000  |

**A**Lowest normal mode frequency: 522.7 cm<sup>-1</sup>Optimized coordinates at  $\omega$ B97XD /6-311+G\* level:

|   |             |             |             |
|---|-------------|-------------|-------------|
| B | 0.01335000  | -0.65415800 | -0.83316300 |
| B | 0.01325800  | -0.39448100 | 0.98307100  |
| B | 0.01331800  | 1.04862800  | -0.14991700 |
| B | 1.30223100  | 0.00002900  | 0.00000200  |
| H | -2.20323300 | 0.00001200  | -0.00004700 |
| H | -0.09041600 | -0.84097300 | 2.09578900  |
| H | -0.09054400 | 2.23549400  | -0.31963400 |
| H | -0.09049100 | -1.39458400 | -1.77615100 |
| H | 2.50150100  | -0.00001200 | 0.00006000  |
| C | -1.12293500 | -0.00000400 | 0.00000200  |

**B**Lowest normal mode frequency: 460.64 cm<sup>-1</sup>Optimized coordinates at  $\omega$ B97XD /6-311+G\* level:

|   |             |             |             |
|---|-------------|-------------|-------------|
| B | 0.00000400  | -0.00027200 | 1.24531800  |
| B | -0.98529200 | -0.71154100 | 0.02105900  |
| B | 0.98529200  | 0.71153100  | 0.02136300  |
| B | 0.71153600  | -0.98529600 | 0.02099300  |
| B | -0.71153600 | 0.98528700  | 0.02142900  |
| H | 0.00000900  | -0.00053500 | 2.44630300  |
| H | -1.94756600 | -1.40634500 | -0.14236100 |
| H | 1.40637500  | -1.94753500 | -0.14249100 |
| H | 1.94756500  | 1.40640700  | -0.14175900 |
| H | -1.40637600 | 1.94759700  | -0.14162900 |
| C | -0.00000400 | 0.00023300  | -1.06367900 |
| H | -0.00000800 | 0.00047000  | -2.14680400 |

## C

Lowest normal mode frequency: 444.71 cm<sup>-1</sup>

Optimized coordinates at  $\omega$ B97XD /6-311+G\* level:

|   |             |             |             |
|---|-------------|-------------|-------------|
| B | 0.99368100  | -0.97887900 | 0.02392200  |
| B | 1.23806500  | 0.64261400  | 0.02406800  |
| B | -0.62394700 | -1.24750600 | 0.02384100  |
| B | -1.37932300 | 0.20790200  | 0.02400800  |
| B | -0.22855000 | 1.37605900  | 0.02413200  |
| H | -2.54897500 | 0.38413600  | -0.17144000 |
| H | -1.15304800 | -2.30532200 | -0.17170600 |
| H | 1.83630800  | -1.80888800 | -0.17163400 |
| H | 2.28798400  | 1.18737500  | -0.17149300 |
| H | -0.42239200 | 2.54291100  | -0.17134300 |
| C | 0.00003100  | 0.00008900  | -1.01320600 |
| H | 0.00008600  | 0.00018100  | -2.10027300 |
| B | 0.00004900  | -0.00029700 | 1.20577500  |
| H | -0.00002200 | -0.00038900 | 2.40839600  |

## D

Lowest normal mode frequency: 295.43 cm<sup>-1</sup>

Optimized coordinates at  $\omega$ B97XD /6-311+G\* level:

|   |             |             |             |
|---|-------------|-------------|-------------|
| B | -0.28529200 | -1.28120700 | -0.00383600 |
| B | 1.34145500  | 0.80921100  | 0.02522900  |
| B | 0.29852100  | -0.00001200 | 1.28904100  |
| B | -1.31958200 | -0.00001100 | 0.78824300  |
| B | -0.28531300 | 1.28120800  | -0.00382000 |
| B | 1.34146400  | -0.80919800 | 0.02521900  |
| H | -2.35283200 | -0.00001900 | 1.39017100  |
| H | -0.70858000 | 2.40259300  | -0.06206500 |
| H | 2.25212200  | -1.58934400 | 0.05377700  |
| H | -0.70861000 | -2.40257200 | -0.06209700 |
| H | 2.25211700  | 1.58935200  | 0.05379900  |
| H | 0.56000000  | -0.00002300 | 2.46258400  |
| H | -1.98501700 | 0.00001100  | -1.43494500 |
| B | 0.34445200  | 0.00000200  | -1.24658200 |
| H | 0.52588300  | -0.00000200 | -2.43367500 |

|   |             |            |             |
|---|-------------|------------|-------------|
| C | -1.16893400 | 0.00000700 | -0.72250300 |
|---|-------------|------------|-------------|

### E

Lowest normal mode frequency: 18.68 cm<sup>-1</sup>

Optimized coordinates at  $\omega$ B97XD /6-311+G\* level:

|   |             |             |             |
|---|-------------|-------------|-------------|
| B | 1.00367400  | 0.55287600  | -0.89068000 |
| B | 1.00367100  | 0.55287400  | 0.89068100  |
| B | 1.42617500  | -0.82981400 | -0.00000100 |
| B | -1.00367100 | 0.55287400  | 0.89068100  |
| B | 0.00000000  | -1.15007700 | 0.89176700  |
| B | 0.00000000  | -1.15008000 | -0.89176600 |
| B | -1.00367400 | 0.55287600  | -0.89068000 |
| B | -1.42617500 | -0.82981400 | -0.00000100 |
| H | 1.66359700  | 1.09143100  | -1.73130900 |
| H | 1.66359300  | 1.09142900  | 1.73131200  |
| H | 0.00000000  | 2.52606100  | -0.00000100 |
| H | 2.46437400  | -1.42322700 | -0.00000100 |
| H | -1.66359300 | 1.09142900  | 1.73131200  |
| H | 0.00000000  | -1.98775000 | 1.74993700  |
| H | 0.00000000  | -1.98775400 | -1.74993500 |
| H | -1.66359700 | 1.09143100  | -1.73130900 |
| H | -2.46437400 | -1.42322600 | -0.00000100 |
| C | 0.00000000  | 1.44526600  | -0.00000100 |

### F

Lowest normal mode frequency: 470.08 cm<sup>-1</sup>

Optimized coordinates at  $\omega$ B97XD /6-311+G\* level:

|   |             |             |             |
|---|-------------|-------------|-------------|
| B | 0.00000000  | 0.00000000  | -1.87044300 |
| B | 0.91835100  | 0.91835100  | -0.77089700 |
| B | -0.91835100 | 0.91835100  | -0.77089700 |
| B | -0.91835100 | -0.91835100 | -0.77089700 |
| B | 0.91835100  | -0.91835100 | -0.77089700 |
| B | 0.00000000  | 1.30197500  | 0.73741400  |
| B | -1.30197500 | 0.00000000  | 0.73741400  |
| B | 0.00000000  | -1.30197500 | 0.73741400  |
| B | 1.30197500  | 0.00000000  | 0.73741400  |
| H | 0.00000000  | 0.00000000  | -3.06455100 |

|   |             |             |             |
|---|-------------|-------------|-------------|
| H | 0.00000000  | 0.00000000  | 2.75021900  |
| H | 1.71851600  | 1.71851600  | -1.16746500 |
| H | -1.71851600 | 1.71851600  | -1.16746500 |
| H | -1.71851600 | -1.71851600 | -1.16746500 |
| H | 1.71851600  | -1.71851600 | -1.16746500 |
| H | 0.00000000  | 2.38363900  | 1.24479300  |
| H | -2.38363900 | 0.00000000  | 1.24479300  |
| H | 0.00000000  | -2.38363900 | 1.24479300  |
| H | 2.38363900  | 0.00000000  | 1.24479300  |
| C | 0.00000000  | 0.00000000  | 1.67114800  |

## G

Lowest normal mode frequency: 232.85 cm<sup>-1</sup>

Optimized coordinates at  $\omega$ B97XD /6-311+G\* level:

|   |             |             |             |
|---|-------------|-------------|-------------|
| B | 0.94713700  | -1.33850900 | -0.19119000 |
| B | 0.94724300  | 1.33835800  | -0.19215900 |
| B | -1.48804200 | 0.00038300  | 0.80939300  |
| B | -0.91146200 | 1.33260500  | -0.23342500 |
| B | -0.02668300 | 0.91354400  | 1.23867700  |
| B | 1.69978300  | -0.00029600 | -0.85104400 |
| B | -0.91162600 | -1.33268300 | -0.23229700 |
| B | 0.06729500  | -0.00087900 | -1.43937500 |
| B | 1.46105200  | 0.00029400  | 0.88075100  |
| B | -0.02670500 | -0.91255400 | 1.23938800  |
| H | 1.36496200  | 2.45038200  | -0.35080800 |
| H | -2.53089300 | 0.00061900  | 1.38978000  |
| H | -1.43474500 | 2.37510100  | -0.48844400 |
| H | -0.06369300 | 1.63745600  | 2.19160500  |
| H | 2.65649400  | -0.00049200 | -1.56596200 |
| H | -1.43484800 | -2.37542500 | -0.48641900 |
| H | 0.06329300  | -0.00120500 | -2.63602900 |
| H | 2.38162800  | 0.00054500  | 1.64819000  |
| H | -0.06372700 | -1.63570500 | 2.19289100  |
| H | -2.32157900 | -0.00049100 | -1.51677300 |
| H | 1.36489600  | -2.45063300 | -0.34899900 |
| C | -1.46195800 | -0.00024400 | -0.86210400 |



## H

Lowest normal mode frequency: 525.77 cm<sup>-1</sup>

Optimized coordinates at  $\omega$ B97XD /6-311+G\* level:

|   |             |             |             |
|---|-------------|-------------|-------------|
| B | -0.09179000 | 1.50554200  | -0.74035300 |
| B | -1.46812100 | 0.38230200  | -0.72265500 |
| B | 1.40196100  | 0.54387900  | -0.74987100 |
| B | 0.94880100  | -1.17394000 | -0.73837400 |
| B | -0.82493400 | -1.27377300 | -0.72155400 |
| B | 0.09251600  | -1.51215400 | 0.77598500  |
| B | 1.47488300  | -0.38381000 | 0.75843400  |
| B | 0.82878800  | 1.27955400  | 0.75706200  |
| B | -1.40771900 | -0.54613600 | 0.78574400  |
| B | -0.95275000 | 1.17927600  | 0.77400700  |
| H | -1.36883800 | -2.11186500 | -1.37356500 |
| H | 0.15814900  | -2.59088700 | 1.28844500  |
| H | 2.52635700  | -0.65777200 | 1.25834100  |
| H | 1.41943900  | 2.19204800  | 1.25613400  |
| H | -1.63256900 | 2.02020600  | 1.28514500  |
| H | -2.41214700 | -0.93589100 | 1.30518500  |
| H | -2.43471000 | 0.63290400  | -1.37553300 |
| H | -0.15371000 | 2.49447700  | -1.40483000 |
| H | 2.32177400  | 0.90068000  | -1.42067600 |
| H | 1.57083500  | -1.94634900 | -1.40154900 |
| B | 0.01575400  | 0.00739000  | 1.70248600  |
| H | 0.02684600  | 0.01252400  | 2.89927700  |
| C | -0.01405100 | -0.00658500 | -1.51992400 |
| H | -0.02406300 | -0.01121300 | -2.60137400 |

## I

Lowest normal mode frequency: 146.44 cm<sup>-1</sup>

Optimized coordinates at  $\omega$ B97XD /6-311+G\* level:

|   |             |             |             |
|---|-------------|-------------|-------------|
| B | -2.12415100 | 0.03676300  | -0.00000300 |
| B | -1.26639500 | 1.41029700  | 0.00004700  |
| B | -1.31890900 | -1.36717300 | -0.00004900 |
| B | -0.84330800 | 0.01969100  | 1.35863600  |

|   |             |             |             |
|---|-------------|-------------|-------------|
| B | 0.28224700  | 1.50497900  | 0.87852900  |
| B | 0.21601700  | -1.48364700 | 0.87994100  |
| B | 0.21600200  | -1.48349100 | -0.88016300 |
| B | 0.28227100  | 1.50512800  | -0.87830200 |
| B | 0.96929200  | -0.00161900 | 1.42384600  |
| B | 0.96930200  | -0.00140600 | -1.42384100 |
| B | 1.63988600  | 0.86237200  | 0.00006900  |
| H | -1.86737100 | 2.44965800  | 0.00008400  |
| H | -1.93068900 | -2.40085400 | -0.00008400 |
| H | -1.33644800 | 0.01317300  | 2.44983500  |
| H | -1.33643000 | 0.01356900  | -2.44984200 |
| H | 2.75329800  | 1.28970900  | 0.00010400  |
| H | 2.40718400  | -1.37106700 | -0.00009600 |
| H | 0.42356200  | -2.48219800 | 1.49848700  |
| H | 0.40470400  | 2.48308500  | 1.55479100  |
| H | 0.40477300  | 2.48334600  | -1.55439400 |
| H | 0.42351300  | -2.48194100 | -1.49888400 |
| H | 1.62210800  | -0.09944000 | -2.41654700 |
| H | 1.62209300  | -0.09979400 | 2.41654200  |
| H | -3.31969800 | 0.05504000  | -0.00000300 |
| B | -0.84329500 | 0.01995200  | -1.35863900 |
| C | 1.47243500  | -0.82691900 | -0.00005700 |

## J

Lowest normal mode frequency: 209.89 cm<sup>-1</sup>

Optimized coordinates at  $\omega$ B97XD /6-311+G\* level:

|   |             |             |             |
|---|-------------|-------------|-------------|
| B | 0.00004700  | 0.00004400  | 1.57885000  |
| B | 1.50984900  | 0.85914400  | -0.73225700 |
| B | 0.01074900  | 1.73692200  | -0.73233900 |
| B | -1.49925100 | 0.87794400  | -0.73197500 |
| B | 1.74384200  | -0.01069100 | 0.76667800  |
| B | 0.86253200  | -1.51559200 | 0.76661900  |
| B | -0.86249100 | 1.51563200  | 0.76658700  |
| B | 0.88136300  | 1.50497600  | 0.76650300  |
| H | -0.00008000 | -0.00006900 | -2.49739400 |
| H | 0.00008300  | 0.00007700  | 2.77457300  |
| H | 2.33879400  | 1.33084400  | -1.44951200 |
| H | 0.01652900  | 2.69061700  | -1.44965100 |
| H | -2.32232200 | 1.36002900  | -1.44909800 |

|   |             |             |             |
|---|-------------|-------------|-------------|
| H | 2.32227000  | -1.36012900 | -1.44914000 |
| H | 2.79848800  | -0.01726000 | 1.32898900  |
| H | 1.38426400  | -2.43223000 | 1.32881300  |
| H | -1.38420200 | 2.43229300  | 1.32876200  |
| H | 1.41433300  | 2.41524800  | 1.32848500  |
| B | 1.49925700  | -0.87801200 | -0.73197300 |
| B | -0.88131500 | -1.50493600 | 0.76664100  |
| B | -1.74379400 | 0.01073800  | 0.76678200  |
| B | -0.01079400 | -1.73691100 | -0.73227800 |
| B | -1.50993400 | -0.85920800 | -0.73208300 |
| H | -2.33890600 | -1.33093900 | -1.44928500 |
| H | -2.79840700 | 0.01735200  | 1.32915600  |
| H | -1.41424000 | -2.41518400 | 1.32870500  |
| H | -0.01661400 | -2.69066400 | -1.44951700 |
| C | -0.00004800 | -0.00003900 | -1.41377800 |

## A1

Lowest normal mode frequency: 256.92 cm<sup>-1</sup>

Optimized coordinates at  $\omega$ B97XD /6-311+G\* level:

|    |             |             |             |
|----|-------------|-------------|-------------|
| B  | -0.42554600 | -0.71428500 | -0.87945700 |
| B  | -0.42571600 | 1.11884700  | -0.17875900 |
| B  | -0.42569600 | -0.40454200 | 1.05833800  |
| B  | -1.63025100 | 0.00001600  | 0.00006000  |
| H  | 2.65344100  | 0.00008200  | 0.00062000  |
| H  | -0.56309700 | 2.29827900  | -0.36741200 |
| H  | -0.56293200 | -0.83097100 | 2.17407500  |
| H  | -0.56327100 | -1.46739000 | -1.80648900 |
| H  | -2.82848100 | -0.00016300 | -0.00029100 |
| Si | 1.17145600  | -0.00000100 | -0.00010100 |

## B1

Lowest normal mode frequency: 335.12 cm<sup>-1</sup>

Optimized coordinates at  $\omega$ B97XD /6-311+G\* level:

|    |             |             |             |
|----|-------------|-------------|-------------|
| B  | -1.49043800 | -0.00000100 | -0.00002200 |
| B  | -0.35953600 | 0.97364600  | -0.82610000 |
| B  | -0.35954800 | -0.97362100 | 0.82611400  |
| B  | -0.35952100 | -0.82612400 | -0.97362300 |
| B  | -0.35954300 | 0.82609400  | 0.97363900  |
| H  | -2.68904800 | -0.00000200 | -0.00004100 |
| H  | -0.42720900 | 1.88612000  | -1.60092600 |
| H  | -0.42719200 | -1.60095000 | -1.88609700 |
| H  | -0.42722100 | -1.88609300 | 1.60094200  |
| H  | -0.42722400 | 1.60091700  | 1.88611500  |
| Si | 1.17048000  | 0.00000300  | -0.00000600 |
| H  | 2.65410900  | -0.00000400 | 0.00005200  |

## C1

Lowest normal mode frequency: 411.58 cm<sup>-1</sup>

Optimized coordinates at  $\omega$ B97XD /6-311+G\* level:

|    |             |             |             |
|----|-------------|-------------|-------------|
| B  | 0.15022500  | 0.86427000  | 1.19951100  |
| B  | 0.36363400  | -1.38399800 | -0.40148100 |
| B  | 1.34292700  | 0.01191900  | 0.16182900  |
| H  | 0.50034200  | -2.52290900 | -0.75103900 |
| H  | -2.62037500 | -0.02318100 | -0.31327300 |
| H  | 0.11140800  | 1.57418400  | 2.16521200  |
| H  | 2.53462000  | 0.02249600  | 0.30519600  |
| H  | 0.13667600  | -1.54414600 | 2.18530600  |
| H  | 0.69944900  | -0.01105300 | -2.58664400 |
| B  | 0.16405000  | -0.84624200 | 1.21050100  |
| H  | 0.45939800  | 2.52080100  | -0.78354100 |
| B  | 0.34119100  | 1.38441100  | -0.41931400 |
| B  | 0.47284100  | -0.00526300 | -1.40903200 |
| Si | -1.14256100 | -0.01012000 | -0.13795000 |

## D1

Lowest normal mode frequency: 220.93 cm<sup>-1</sup>

Optimized coordinates at  $\omega$ B97XD /6-311+G\* level:

|    |             |             |             |
|----|-------------|-------------|-------------|
| B  | 0.54963500  | 0.04826800  | 1.31774100  |
| B  | 0.54963500  | 0.04826800  | -1.31774100 |
| B  | 0.77713700  | 1.28838200  | 0.00000000  |
| B  | -0.78216000 | 1.07566000  | 0.83663000  |
| B  | -0.78216000 | 1.07566000  | -0.83663000 |
| B  | 1.69982600  | -0.17471600 | 0.00000000  |
| H  | -1.43872500 | 1.71509600  | 1.60942100  |
| H  | -1.43872500 | 1.71509600  | -1.60942100 |
| H  | 2.89618600  | -0.25470400 | 0.00000000  |
| H  | 0.83292400  | -0.08729600 | 2.47572800  |
| H  | 0.83292400  | -0.08729500 | -2.47572800 |
| H  | 1.32467100  | 2.35835500  | 0.00000000  |
| H  | -2.41472300 | -1.45922700 | 0.00000000  |
| B  | 0.70102300  | -1.46354300 | 0.00000000  |
| H  | 1.09004300  | -2.59607400 | 0.00000000  |
| Si | -1.08923300 | -0.77098900 | 0.00000000  |

## E1

Lowest normal mode frequency: 178.01 cm<sup>-1</sup>

Optimized coordinates at  $\omega$ B97XD /6-311+G\* level:

|   |             |             |             |
|---|-------------|-------------|-------------|
| B | -0.08546100 | -0.94273100 | 1.03790300  |
| B | -0.40737200 | -1.41627600 | -0.73899100 |
| B | 1.10537700  | -1.44878400 | -0.11601200 |
| B | -0.40737200 | 1.41627600  | -0.73899100 |
| B | 1.22062900  | 0.00000000  | -1.05055100 |
| B | 1.45248100  | 0.00000000  | 0.76341100  |
| B | -0.08546100 | 0.94273100  | 1.03790300  |
| B | 1.10537700  | 1.44878400  | -0.11601200 |
| H | -0.44051600 | -1.54240400 | 2.01584100  |
| H | -0.79703100 | -2.32350600 | -1.41591800 |
| H | -2.99183000 | 0.00000000  | 0.35714200  |
| H | 1.82827200  | -2.39963100 | -0.19275100 |

|    |             |            |             |
|----|-------------|------------|-------------|
| H  | -0.79703100 | 2.32350600 | -1.41591800 |
| H  | 1.91520700  | 0.00000000 | -2.02925300 |
| H  | 2.40726400  | 0.00000000 | 1.49164000  |
| H  | -0.44051500 | 1.54240400 | 2.01584100  |
| H  | 1.82827200  | 2.39963100 | -0.19275200 |
| Si | -1.57164800 | 0.00000000 | -0.07336900 |

## F1

Lowest normal mode frequency: 353.34 cm<sup>-1</sup>

Optimized coordinates at  $\omega$ B97XD /6-311+G\* level:

|    |             |             |             |
|----|-------------|-------------|-------------|
| B  | 0.69821200  | 1.70639500  | 0.00000000  |
| B  | 0.11280100  | 0.70136500  | 1.34387400  |
| B  | -0.94593400 | 1.31228500  | 0.00000000  |
| B  | 0.11280100  | 0.70136500  | -1.34387400 |
| B  | -1.40690000 | -0.17857800 | 0.91627000  |
| B  | -1.40690000 | -0.17857800 | -0.91627000 |
| B  | 0.11280100  | -1.17188600 | -0.96604500 |
| B  | 0.11280100  | -1.17188600 | 0.96604500  |
| H  | 1.21885600  | 2.77999500  | 0.00000000  |
| H  | -1.84994500 | -2.61364700 | 0.00000000  |
| H  | 0.27167200  | 1.04565900  | 2.47878400  |
| H  | -1.69853100 | 2.24398400  | 0.00000000  |
| H  | 0.27167200  | 1.04565900  | -2.47878400 |
| H  | 2.96301400  | -0.39128200 | 0.00000000  |
| H  | -2.29027500 | -0.10779400 | 1.72332300  |
| H  | -2.29027500 | -0.10779400 | -1.72332300 |
| H  | 0.57348200  | -1.94085400 | -1.76324100 |
| H  | 0.57348200  | -1.94085400 | 1.76324100  |
| B  | -1.21529400 | -1.60257600 | 0.00000000  |
| Si | 1.52749300  | -0.04304200 | 0.00000000  |

## G1

Lowest normal mode frequency: 209.59 cm<sup>-1</sup>

Optimized coordinates at  $\omega$ B97XD /6-311+G\* level:

|   |             |             |             |
|---|-------------|-------------|-------------|
| B | -0.34308800 | 0.22130600  | -1.43907400 |
| B | -1.48835400 | -0.77428100 | 0.78861600  |
| B | 0.93844500  | 0.98253600  | 0.95494400  |
| B | 0.21473100  | -0.67459600 | 1.31459800  |
| B | -0.79639500 | 0.80083100  | 1.25760500  |

|    |             |             |             |
|----|-------------|-------------|-------------|
| B  | -1.60124400 | -0.83880100 | -0.96341700 |
| B  | 1.23714900  | 1.07290300  | -0.89608200 |
| B  | -0.23353000 | -1.51473100 | -0.27512500 |
| B  | -1.77290200 | 0.66880300  | -0.22183700 |
| B  | -0.22375400 | 1.62872000  | -0.21576000 |
| H  | -2.26936100 | -1.34637300 | 1.49419100  |
| H  | 1.63769600  | 1.57498800  | 1.72491500  |
| H  | 0.55962400  | -1.30387800 | 2.27429000  |
| H  | -1.22110800 | 1.37626100  | 2.21694500  |
| H  | -2.35635700 | -1.41962400 | -1.68342600 |
| H  | 1.88640000  | 1.82879300  | -1.55165100 |
| H  | 0.00967500  | -2.66038500 | -0.55083400 |
| H  | -2.75689800 | 1.33976500  | -0.34981300 |
| H  | -0.42870400 | 2.77856700  | -0.47579400 |
| H  | 2.82602200  | -1.47276500 | 0.06768600  |
| H  | -0.28795400 | 0.25683200  | -2.63525300 |
| Si | 1.62469100  | -0.62968700 | -0.14668500 |

## H1

Lowest normal mode frequency: 421.41 cm<sup>-1</sup>

Optimized coordinates at  $\omega$ B97XD /6-311+G\* level:

|   |             |             |             |
|---|-------------|-------------|-------------|
| B | -0.49759900 | -0.94305400 | -1.28345900 |
| B | -0.49757400 | 0.92919100  | -1.29357600 |
| B | -0.49762300 | -1.51211100 | 0.50031000  |
| B | -0.49770200 | 0.00861400  | 1.59268800  |
| B | -0.49763000 | 1.51743400  | 0.48395200  |
| B | 0.99196000  | 0.90040400  | 1.22534900  |
| B | 0.99199000  | -0.88713800 | 1.23499700  |
| B | 0.99203800  | -1.44865300 | -0.46207900 |
| B | 0.99201500  | 1.44359100  | -0.47766000 |
| B | 0.99207800  | -0.00821400 | -1.52048500 |
| H | -1.00809900 | 2.54903500  | 0.81292400  |
| H | 1.52551700  | 1.53441800  | 2.08820200  |
| H | 1.52561600  | -1.51181100 | 2.10460100  |
| H | 1.52568300  | -2.46872200 | -0.78745700 |
| H | 1.52573200  | -0.01402400 | -2.59117500 |
| H | 1.52561200  | 2.46011300  | -0.81402800 |
| H | -1.00800200 | 1.56088000  | -2.17302100 |
| H | -1.00797400 | -1.58422200 | -2.15604000 |
| H | -1.00800400 | -2.54012900 | 0.84043200  |
| H | -1.00818000 | 0.01447400  | 2.67545600  |

|    |             |             |             |
|----|-------------|-------------|-------------|
| Si | -1.74374500 | -0.00003600 | -0.00003100 |
| H  | -3.21687100 | 0.00000900  | -0.00008300 |
| B  | 1.91423000  | 0.00003000  | 0.00006400  |
| H  | 3.11049400  | 0.00001500  | 0.00012400  |

## I1

Lowest normal mode frequency: 154.52 cm<sup>-1</sup>

Optimized coordinates at  $\omega$ B97XD /6-311+G\* level:

|    |             |             |             |
|----|-------------|-------------|-------------|
| B  | 2.19886100  | -0.74128200 | -0.00000300 |
| B  | 1.90468500  | 0.85470900  | 0.00000200  |
| B  | 0.94506000  | -1.76076300 | -0.00000500 |
| B  | 1.01570000  | -0.25951600 | -1.35700800 |
| B  | 0.52044100  | 1.53654200  | -0.88381800 |
| B  | -0.50423700 | -1.31971000 | -0.92706800 |
| B  | -0.50424300 | -1.31972600 | 0.92704300  |
| B  | 0.52044000  | 1.53652300  | 0.88384400  |
| B  | -0.66873900 | 0.41043800  | -1.49342300 |
| B  | -0.66874100 | 0.41041200  | 1.49342800  |
| B  | -0.98151500 | 1.53567800  | 0.00001200  |
| H  | 2.85702500  | 1.58480600  | 0.00000500  |
| H  | 1.14637500  | -2.94487300 | -0.00000900 |
| H  | 1.48897100  | -0.44755800 | -2.44077400 |
| H  | 1.48896300  | -0.44760400 | 2.44076800  |
| H  | -1.72660000 | 2.47219300  | 0.00002000  |
| H  | -3.35858800 | -0.46297400 | -0.00000600 |
| H  | -0.91623900 | -2.21391400 | -1.60837700 |
| H  | 0.80419700  | 2.49063400  | -1.54676100 |
| H  | 0.80419900  | 2.49060000  | 1.54680800  |
| H  | -0.91625100 | -2.21394000 | 1.60833500  |
| H  | -1.17185800 | 0.61183400  | 2.56010900  |
| H  | -1.17185400 | 0.61187700  | -2.56010200 |
| H  | 3.32454400  | -1.14419900 | -0.00000600 |
| B  | 1.01569400  | -0.25954700 | 1.35700300  |
| Si | -1.90142200 | -0.25040500 | -0.00000400 |

## J1

Lowest normal mode frequency: 365.42 cm<sup>-1</sup>

Optimized coordinates at  $\omega$ B97XD /6-311+G\* level:

|   |            |            |             |
|---|------------|------------|-------------|
| B | 0.00004700 | 0.00005100 | -1.74266600 |
|---|------------|------------|-------------|



|    |             |             |             |
|----|-------------|-------------|-------------|
| B  | 0.86337000  | 1.60500100  | 0.55461700  |
| B  | 1.82173300  | 0.05469900  | 0.55465400  |
| B  | 0.95833300  | -1.55031100 | 0.55438400  |
| B  | -0.05237500 | 1.74346100  | -0.94119600 |
| B  | -1.53613600 | 0.82632400  | -0.94124400 |
| B  | 1.53618700  | -0.82626900 | -0.94120900 |
| B  | 1.48380900  | 0.91724400  | -0.94099500 |
| H  | -0.00008400 | -0.00009100 | 3.09388900  |
| H  | 0.00008000  | 0.00008700  | -2.93819300 |
| H  | 1.36210600  | 2.53229000  | 1.12056800  |
| H  | 2.87425500  | 0.08637300  | 1.12043600  |
| H  | 1.51182200  | -2.44602500 | 1.12029100  |
| H  | -1.51188500 | 2.44596300  | 1.12035600  |
| H  | -0.08334700 | 2.77476500  | -1.54405300 |
| H  | -2.44472200 | 1.31509900  | -1.54420200 |
| H  | 2.44480300  | -1.31501200 | -1.54414700 |
| H  | 2.36144500  | 1.45967400  | -1.54391000 |
| B  | -0.95836800 | 1.55028600  | 0.55441900  |
| B  | -1.48375800 | -0.91718900 | -0.94113000 |
| B  | 0.05242600  | -1.74340500 | -0.94129600 |
| B  | -1.82175400 | -0.05473200 | 0.55455500  |
| B  | -0.86340500 | -1.60504200 | 0.55447100  |
| H  | -1.36216900 | -2.53236000 | 1.12034800  |
| H  | 0.08343700  | -2.77467300 | -1.54421200 |
| H  | -2.36136400 | -1.45957800 | -1.54412500 |
| H  | -2.87431200 | -0.08643900 | 1.12027100  |
| Si | -0.00004400 | -0.00004800 | 1.62141900  |
